# Supplementary material for: Chimeric chromosome landscapes of human somatic cell cultures show dependence on stress and regulation of genomic repeats by CGGBP1
Source: bioRxiv or medRxiv preprint supplement (doi:10.1101/2021.10.30.466567), 2021-10-30
Supplement: Supplementary file [file media-1.pdf]

Expected

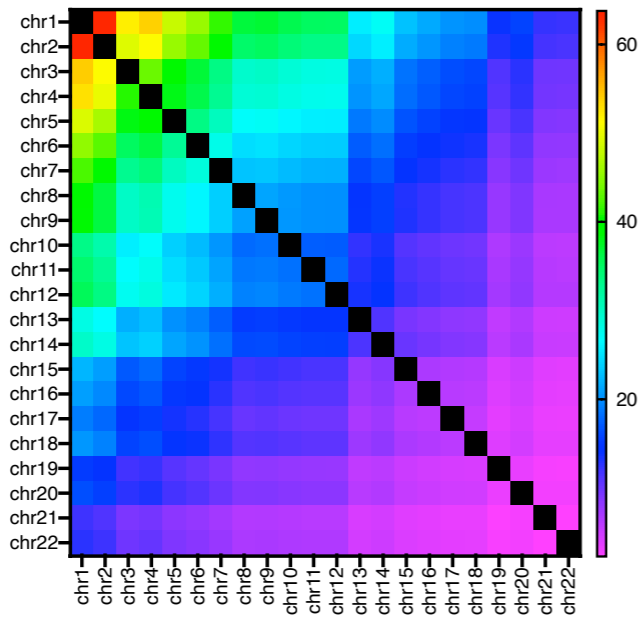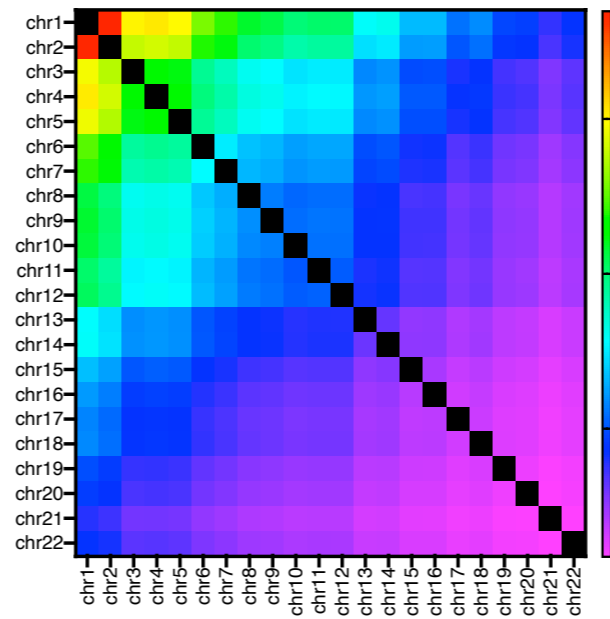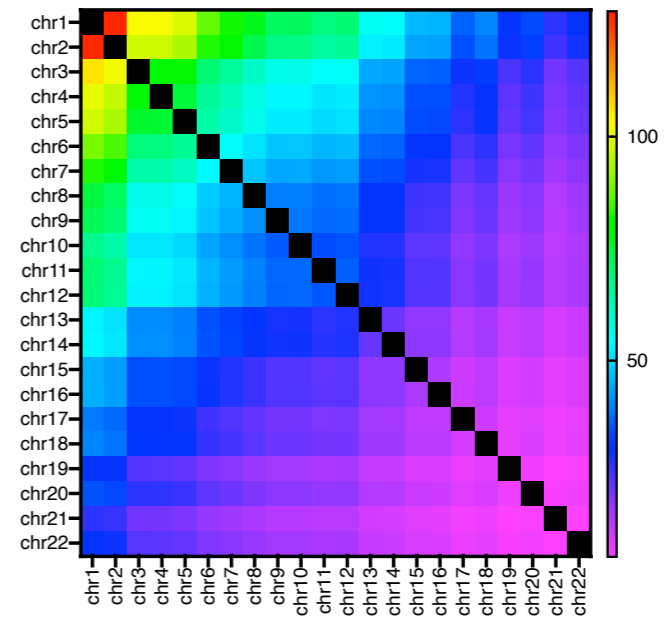

Observed

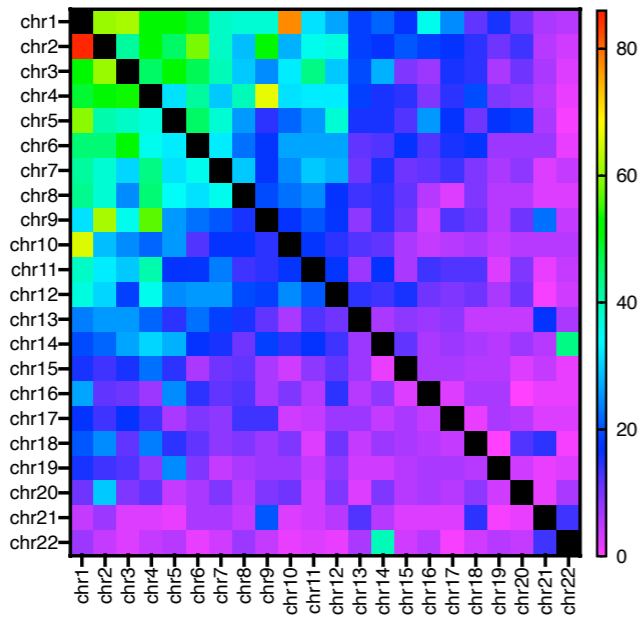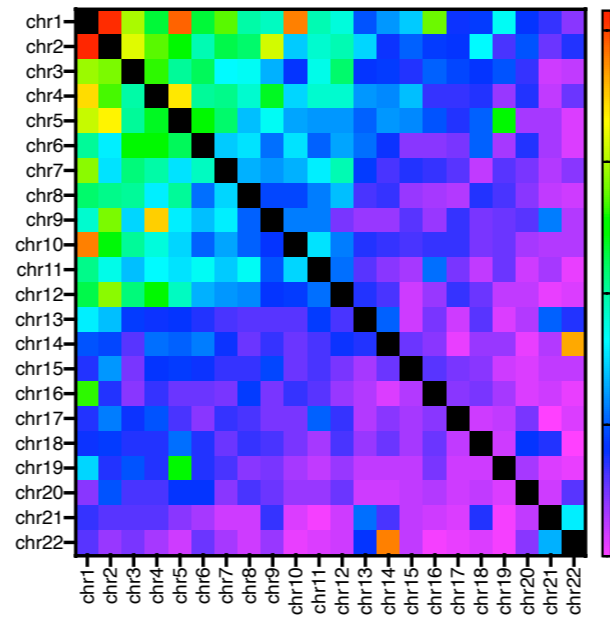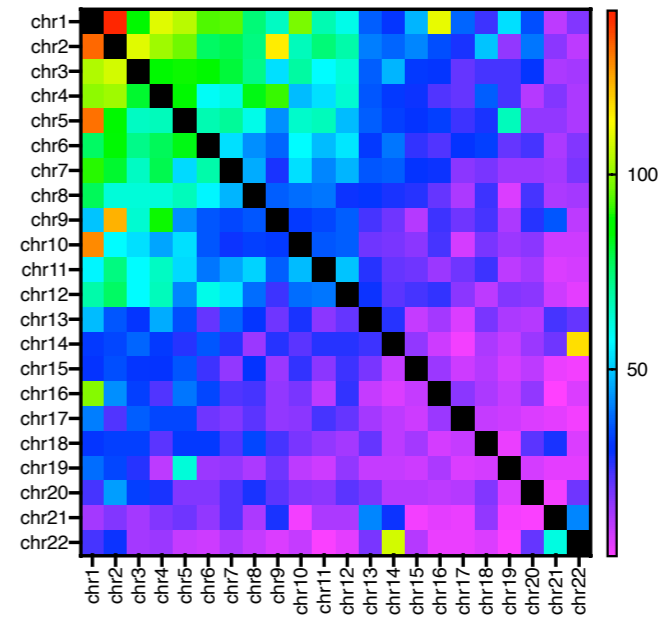

37°C

40°C - 24h

Rec
