# Supplementary material for: Chimeric chromosome landscapes of human somatic cell cultures show dependence on stress and regulation of genomic repeats by CGGBP1
Source: bioRxiv or medRxiv preprint supplement (doi:10.1101/2021.10.30.466567), 2021-10-30

CGGBP1-non-targeting siRNA pool + -  
CGGBP1-targeting siRNA pool - +

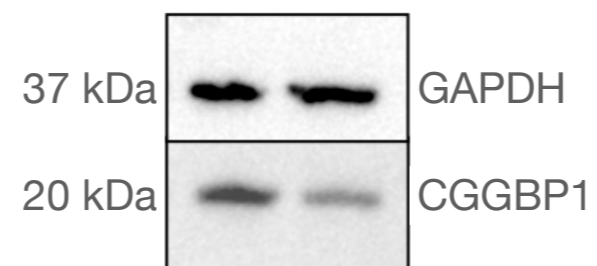

Supplement: Supplementary file [file media-3.pdf]
