# Supplementary material for: Chimeric chromosome landscapes of human somatic cell cultures show dependence on stress and regulation of genomic repeats by CGGBP1
Source: bioRxiv or medRxiv preprint supplement (doi:10.1101/2021.10.30.466567), 2021-10-30
Supplement: Supplementary file [file media-5.pdf]

Expected

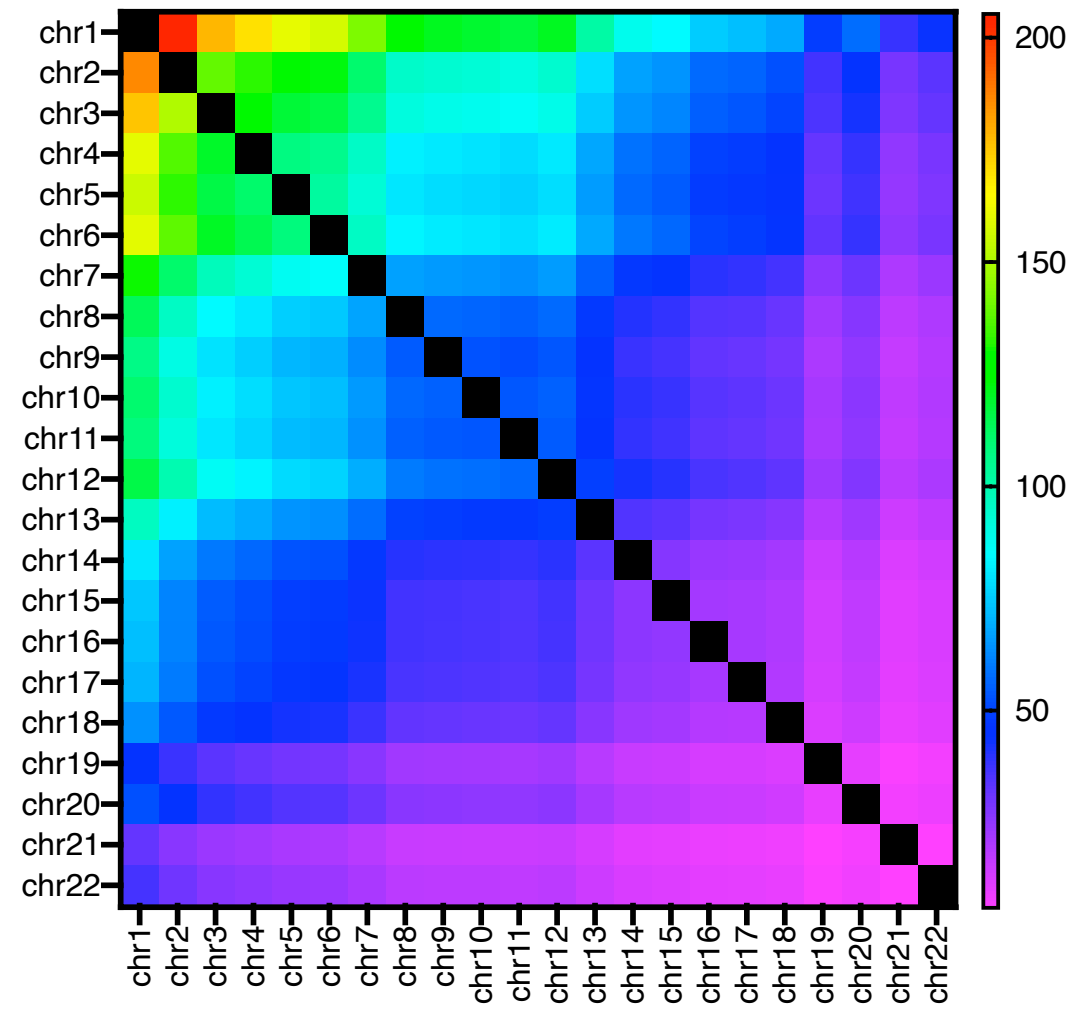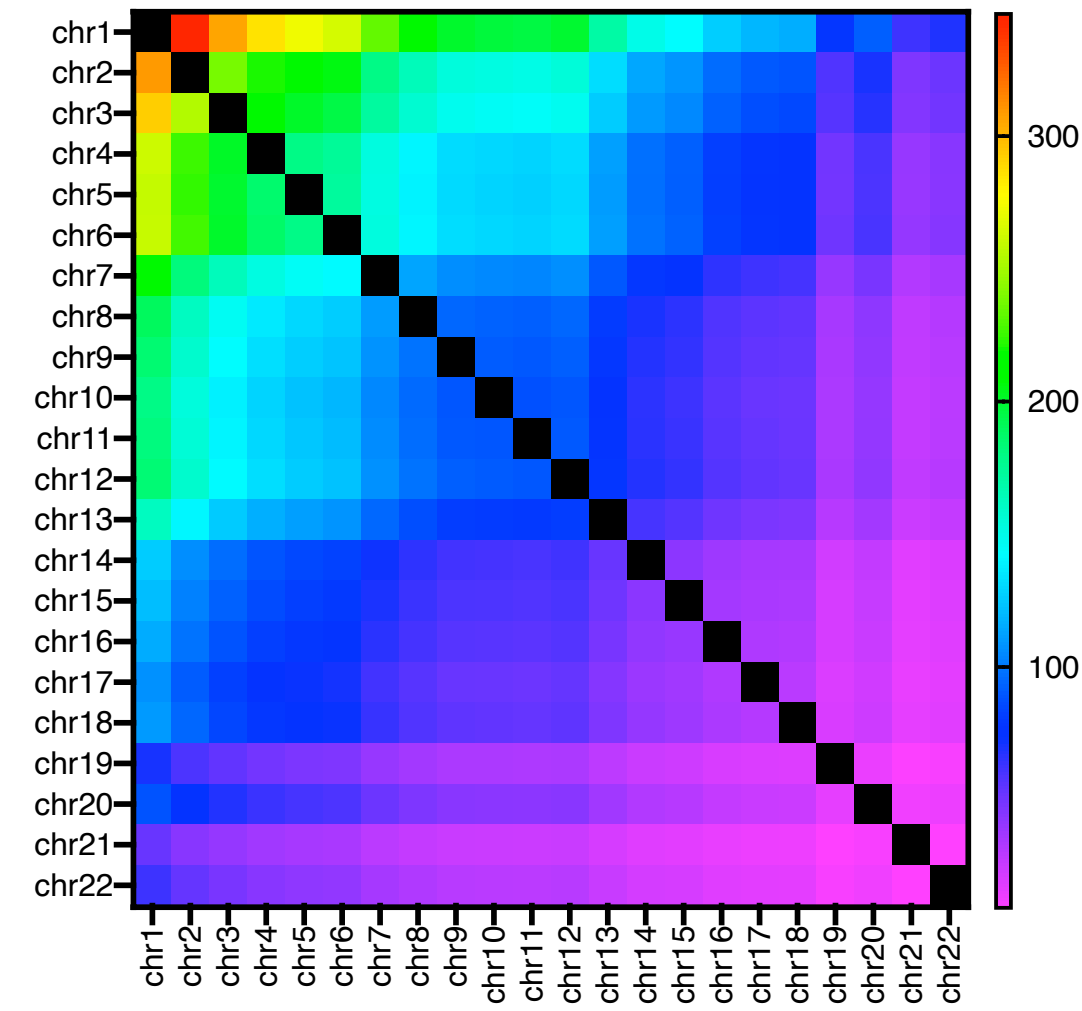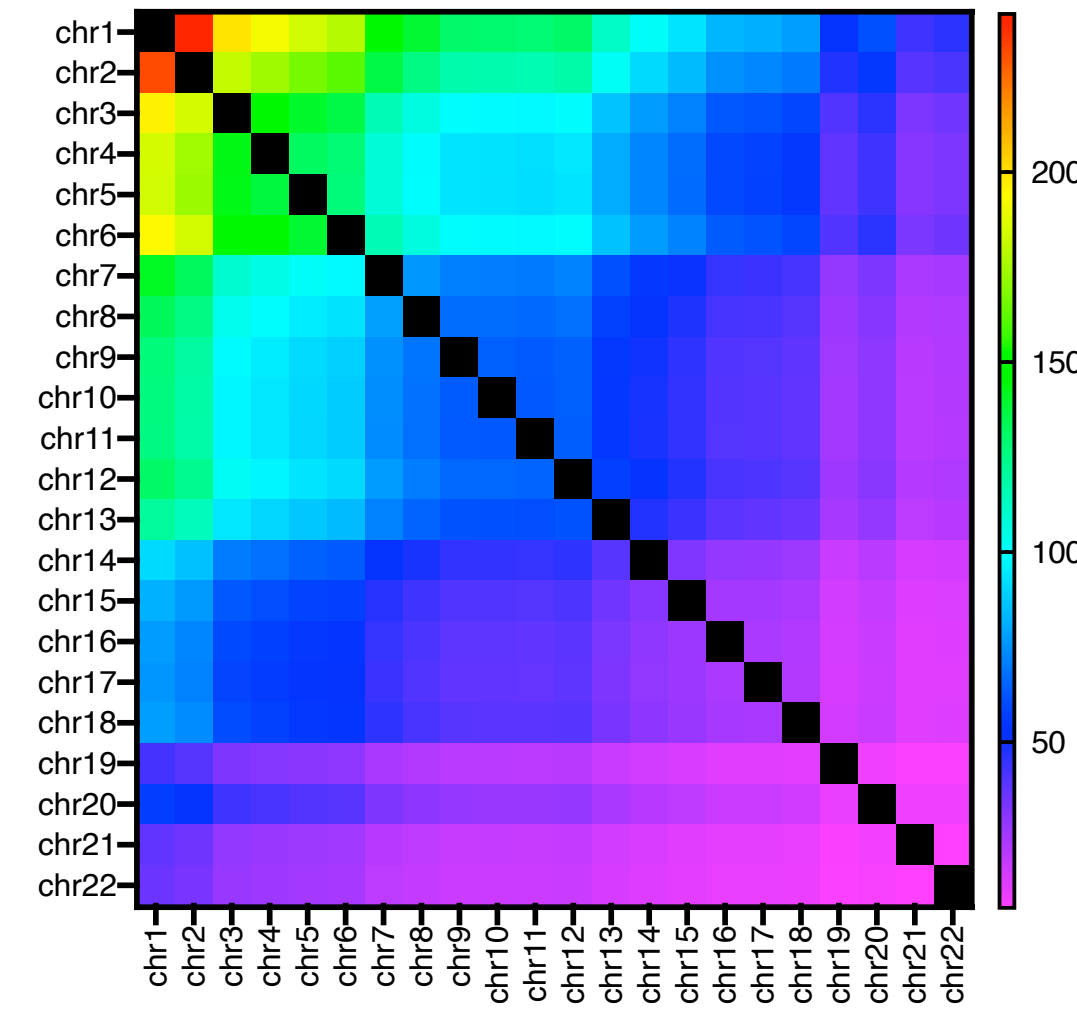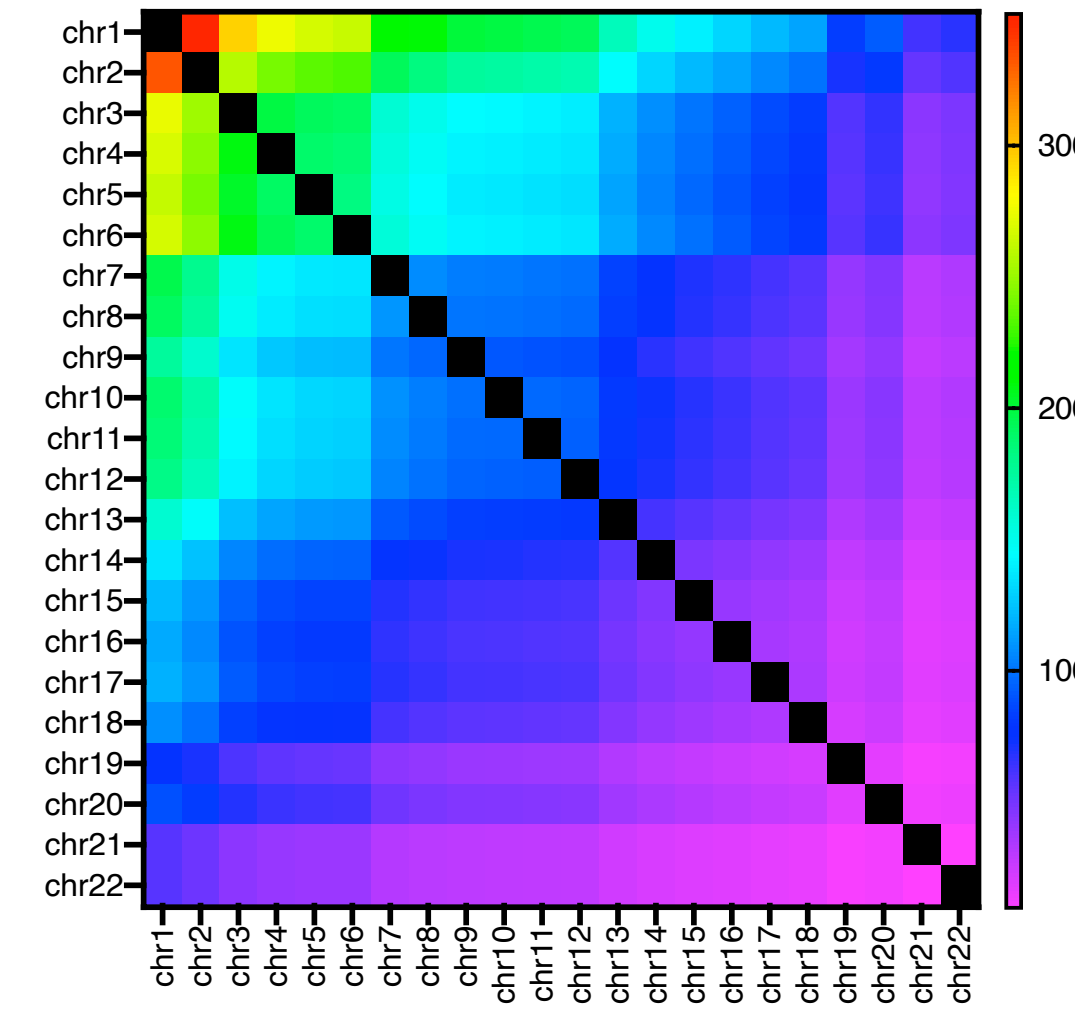

Observed

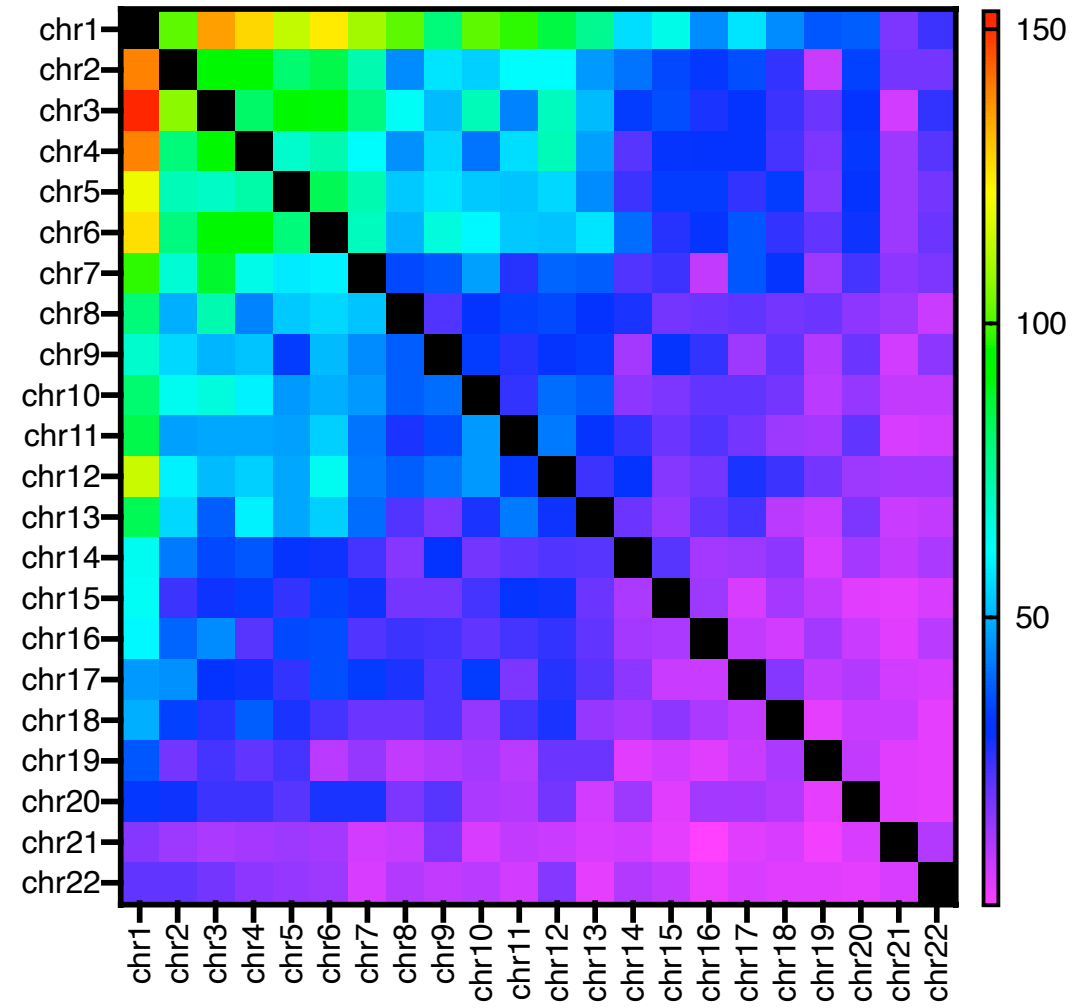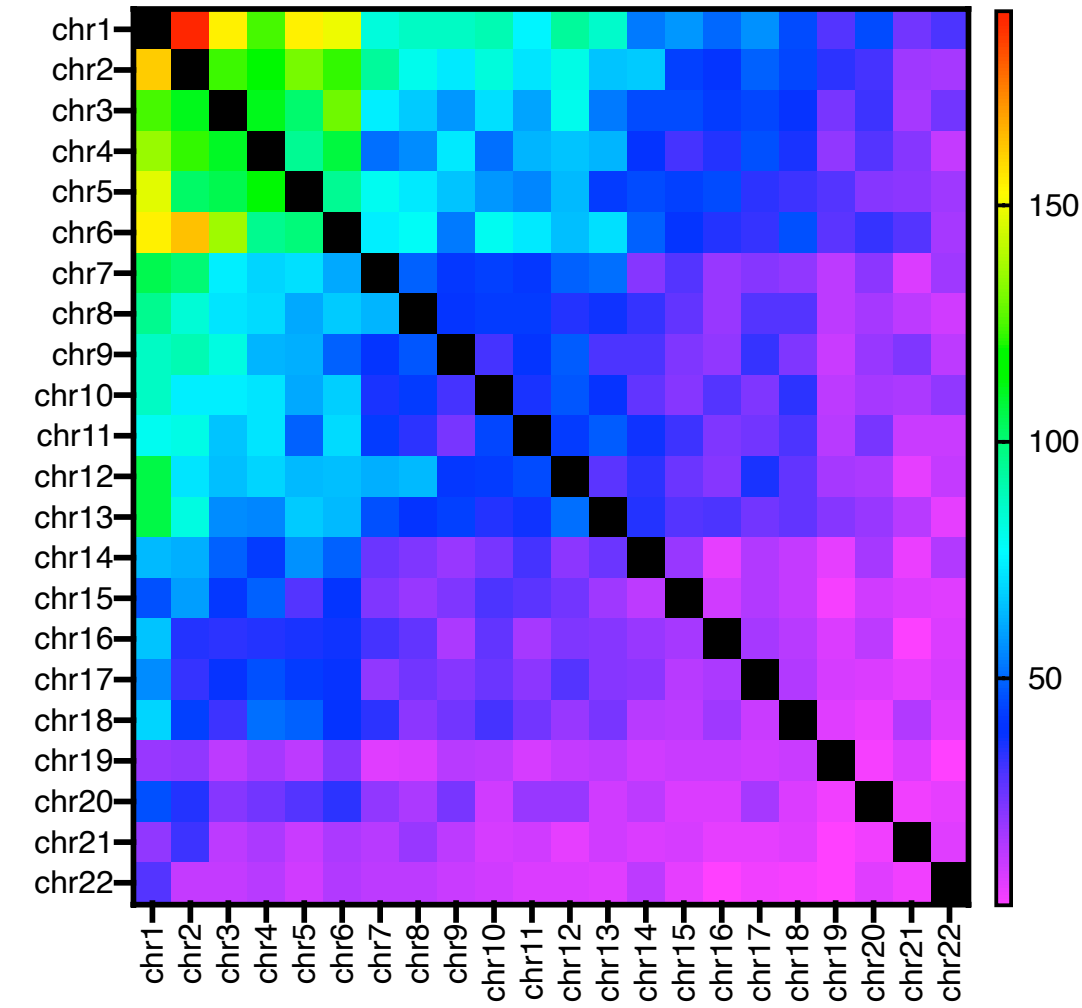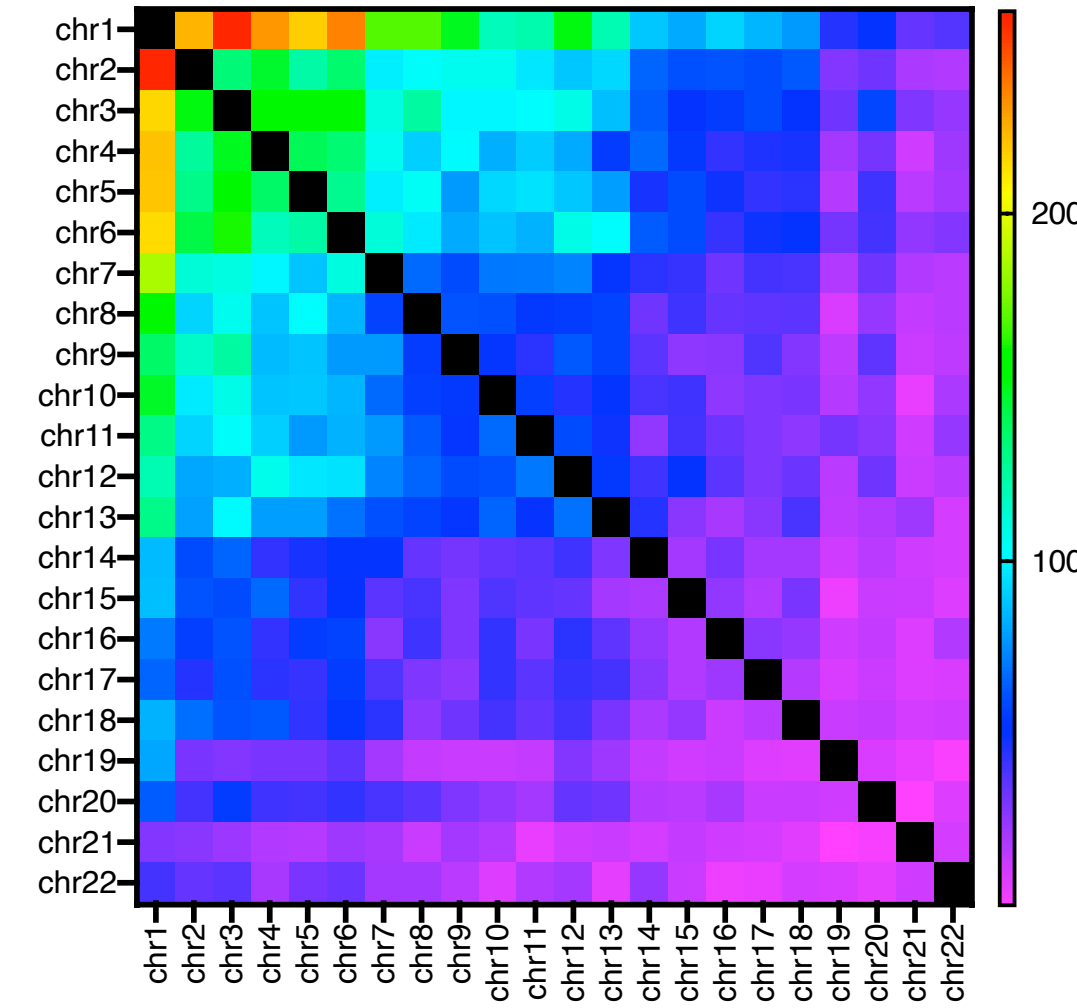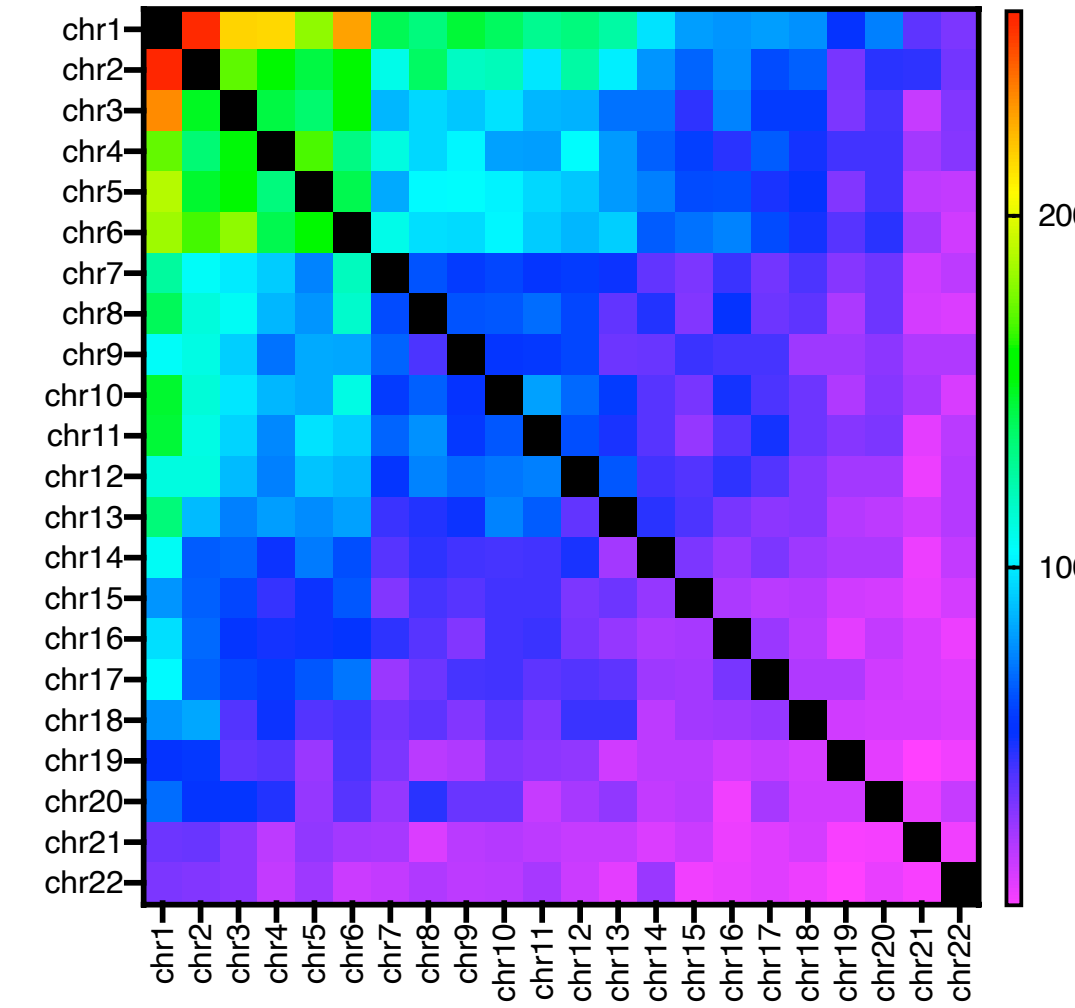

HEK293T-CT 37°C

HEK293T-KD 37°C

HEK293T-CT 42°C - 24h

HEK293T-KD 42°C - 24h
