# Supplementary material for: Chimeric chromosome landscapes of human somatic cell cultures show dependence on stress and regulation of genomic repeats by CGGBP1
Source: bioRxiv or medRxiv preprint supplement (doi:10.1101/2021.10.30.466567), 2021-10-30
Supplement: Supplementary file [file media-10.pdf]

Table S1

| <b>Fibroblast (GM02639) sequencing details<br/>(data run through Porechop)</b> |             |                   |            |
|--------------------------------------------------------------------------------|-------------|-------------------|------------|
| <b>Sample Name</b>                                                             | <b>37°C</b> | <b>40°C - 24h</b> | <b>Rec</b> |
| Read count                                                                     | 597103      | 1528595           | 2349238    |
| Base count                                                                     | 8003216090  | 3889197457        | 7184368217 |
| Mean read length                                                               | 13403.41    | 2544.30           | 3058.17    |
| Reads mapped by bowtie2                                                        | 572621      | 1285361           | 2010421    |
| Aligned reads (%)                                                              | 95.90       | 84.09             | 85.58      |
