# Supplementary material for: Chimeric chromosome landscapes of human somatic cell cultures show dependence on stress and regulation of genomic repeats by CGGBP1
Source: bioRxiv or medRxiv preprint supplement (doi:10.1101/2021.10.30.466567), 2021-10-30
Supplement: Supplementary file [file media-11.pdf]

| Repeat types                       | 37°C               |                      |              | 40°C - 24h         |                      |              | Rec                |                      |              |
|------------------------------------|--------------------|----------------------|--------------|--------------------|----------------------|--------------|--------------------|----------------------|--------------|
|                                    | Number of elements | Length occupied (bp) | Sequence (%) | Number of elements | Length occupied (bp) | Sequence (%) | Number of elements | Length occupied (bp) | Sequence (%) |
| <b>SINEs:</b>                      | 1142               | 125687               | 7.28         | 2163               | 292474               | 9.6          | 2609               | 347859               | 10.96        |
| <b>ALUs</b>                        | 1067               | 119247               | 6.91         | 1992               | 276179               | 9.07         | 2462               | 334884               | 10.55        |
| <b>MIRs</b>                        | 74                 | 6380                 | 0.37         | 170                | 16141                | 0.53         | 146                | 12895                | 0.41         |
| <b>LINEs:</b>                      | 4093               | 700490               | 40.57        | 5046               | 800672               | 26.29        | 6567               | 1045142              | 32.93        |
| <b>LINE1</b>                       | 4025               | 694278               | 40.21        | 4928               | 788116               | 25.87        | 6404               | 1028639              | 32.41        |
| <b>LINE2</b>                       | 63                 | 5770                 | 0.33         | 105                | 11391                | 0.37         | 150                | 15266                | 0.48         |
| <b>L3/CR1</b>                      | 4                  | 396                  | 0.02         | 9                  | 827                  | 0.03         | 11                 | 1067                 | 0.03         |
| <b>LTR elements:</b>               | 710                | 105263               | 6.1          | 1203               | 164224               | 5.39         | 1260               | 168221               | 5.3          |
| <b>ERV_L</b>                       | 54                 | 6570                 | 0.38         | 149                | 17028                | 0.56         | 129                | 14192                | 0.45         |
| <b>ERV_L-MaLRs</b>                 | 166                | 18397                | 1.07         | 397                | 47752                | 1.57         | 406                | 45705                | 1.44         |
| <b>ERV_classI</b>                  | 337                | 54013                | 3.13         | 510                | 75581                | 2.48         | 550                | 81453                | 2.57         |
| <b>ERV_classII</b>                 | 153                | 26283                | 1.52         | 139                | 23087                | 0.76         | 164                | 25964                | 0.82         |
| <b>DNA elements:</b>               | 149                | 16608                | 0.96         | 330                | 35943                | 1.18         | 343                | 33572                | 1.06         |
| <b>hAT-Charlie</b>                 | 62                 | 6633                 | 0.38         | 126                | 12964                | 0.43         | 161                | 15661                | 0.49         |
| <b>TcMar-Tigger</b>                | 58                 | 6732                 | 0.39         | 142                | 16926                | 0.56         | 133                | 13436                | 0.42         |
| <b>Unclassified:</b>               | 384                | 51035                | 2.96         | 387                | 41448                | 1.36         | 501                | 55290                | 1.74         |
| <b>Total interspersed repeats:</b> |                    | 999083               | 57.86        |                    | 1334761              | 43.82        |                    | 1650084              | 51.99        |
| <b>Small RNA:</b>                  | 174                | 11219                | 0.65         | 261                | 20524                | 0.67         | 266                | 14829                | 0.47         |
| <b>Satellites:</b>                 | 604                | 104211               | 6.04         | 1319               | 223112               | 7.32         | 1179               | 198216               | 6.25         |
| <b>Simple repeats:</b>             | 571                | 23838                | 1.38         | 1087               | 64160                | 2.11         | 908                | 38319                | 1.21         |
| <b>Low complexity:</b>             | 56                 | 2872                 | 0.17         | 128                | 7715                 | 0.25         | 105                | 5887                 | 0.19         |
| <b>% of bases masked</b>           |                    |                      | 66.1         |                    |                      | 54.18        |                    |                      | 60.1         |
| <b>% of bases unmasked</b>         |                    |                      | 33.9         |                    |                      | 45.82        |                    |                      | 39.9         |
