# Supplementary material for: Chimeric chromosome landscapes of human somatic cell cultures show dependence on stress and regulation of genomic repeats by CGGBP1
Source: bioRxiv or medRxiv preprint supplement (doi:10.1101/2021.10.30.466567), 2021-10-30
Supplement: Supplementary file [file media-12.pdf]

Table S3

| <b>GM02639<br/>samples</b> | <b>%Alu-SINEs</b> |             |             | <b>%LINE-1</b> |            |            |
|----------------------------|-------------------|-------------|-------------|----------------|------------|------------|
|                            | <b>AluJ</b>       | <b>AluS</b> | <b>AluY</b> | <b>L1H</b>     | <b>L1M</b> | <b>L1P</b> |
| <b>37°C</b>                | 9.61              | 48.26       | 42.13       | 2.62           | 10.57      | 86.81      |
| <b>40°C - 24h</b>          | 13.12             | 59.44       | 27.44       | 2.97           | 23.74      | 73.29      |
| <b>Rec</b>                 | 12.08             | 57.97       | 29.96       | 3.54           | 18.98      | 77.49      |
