# Supplementary material for: Chimeric chromosome landscapes of human somatic cell cultures show dependence on stress and regulation of genomic repeats by CGGBP1
Source: bioRxiv or medRxiv preprint supplement (doi:10.1101/2021.10.30.466567), 2021-10-30
Supplement: Supplementary file [file media-13.pdf]

Table S4

| <b>GM02639 samples</b> | <b>37°C</b> | <b>40°C - 24h</b> | <b>Rec</b> |
|------------------------|-------------|-------------------|------------|
| Number of U bins       | 8633        | 15230             | 15868      |
| % CpG content          | 1.31        | 1.36              | 1.27       |
| % GC content           | 41.00       | 41.71             | 40.98      |
