# Supplementary material for: Chimeric chromosome landscapes of human somatic cell cultures show dependence on stress and regulation of genomic repeats by CGGBP1
Source: bioRxiv or medRxiv preprint supplement (doi:10.1101/2021.10.30.466567), 2021-10-30
Supplement: Supplementary file [file media-14.pdf]

Table S5

| Repeat types                       | GM02639-CT         |                      |              | GM02639-KD         |                      |              |
|------------------------------------|--------------------|----------------------|--------------|--------------------|----------------------|--------------|
|                                    | Number of elements | Length occupied (bp) | Sequence (%) | Number of elements | Length occupied (bp) | Sequence (%) |
| <b>SINEs:</b>                      | 14917              | 1931519              | 20.41        | 6066               | 853679               | 19.58        |
| <b>ALUs</b>                        | 14375              | 1884855              | 19.92        | 5812               | 830905               | 19.06        |
| <b>MIRs</b>                        | 542                | 46664                | 0.49         | 254                | 22774                | 0.52         |
| <b>LINEs:</b>                      | 10123              | 1245583              | 13.16        | 3893               | 509551               | 11.69        |
| <b>LINE1</b>                       | 9441               | 1183032              | 12.5         | 3630               | 484201               | 11.1         |
| <b>LINE2</b>                       | 640                | 58961                | 0.62         | 251                | 24041                | 0.55         |
| <b>L3/CR1</b>                      | 33                 | 2655                 | 0.03         | 7                  | 702                  | 0.02         |
| <b>LTR elements:</b>               | 4130               | 449761               | 4.75         | 1354               | 152978               | 3.51         |
| <b>ERV1</b>                        | 685                | 76136                | 0.8          | 212                | 22163                | 0.51         |
| <b>ERV1-MaLRs</b>                  | 1820               | 203026               | 2.15         | 609                | 71300                | 1.64         |
| <b>ERV_classI</b>                  | 1226               | 132615               | 1.4          | 459                | 51294                | 1.18         |
| <b>ERV_classII</b>                 | 382                | 36316                | 0.38         | 62                 | 7004                 | 0.16         |
| <b>DNA elements:</b>               | 1316               | 125318               | 1.32         | 540                | 51774                | 1.19         |
| <b>hAT-Charlie</b>                 | 592                | 52865                | 0.56         | 235                | 20568                | 0.47         |
| <b>TcMar-Tigger</b>                | 536                | 54842                | 0.58         | 216                | 23943                | 0.55         |
| <b>Unclassified:</b>               | 1657               | 111204               | 1.18         | 674                | 47300                | 1.08         |
| <b>Total interspersed repeats:</b> |                    | 3863385              | 40.83        |                    | 1615282              | 37.05        |
| <b>Small RNA:</b>                  | 1572               | 88300                | 0.93         | 628                | 35470                | 0.81         |
| <b>Satellites:</b>                 | 11242              | 2087359              | 22.06        | 6102               | 1164495              | 26.71        |
| <b>Simple repeats:</b>             | 6888               | 567282               | 6            | 4029               | 356982               | 8.19         |
| <b>Low complexity:</b>             | 202                | 9405                 | 0.1          | 73                 | 3522                 | 0.08         |
