# Supplementary material for: Chimeric chromosome landscapes of human somatic cell cultures show dependence on stress and regulation of genomic repeats by CGGBP1
Source: bioRxiv or medRxiv preprint supplement (doi:10.1101/2021.10.30.466567), 2021-10-30
Supplement: Supplementary file [file media-15.pdf]

Table S6

| <b>Samples</b>                                 | <b>GM02639-CT</b> | <b>GM02639-KD</b> |
|------------------------------------------------|-------------------|-------------------|
| Read counts with unexpected allelic identities | 2328783           | 1084232           |
| Read counts with expected allelic identities   | 4237592           | 1998307           |
| Somatic mutation rate                          | 54.96             | 54.26             |
