# Supplementary material for: Chimeric chromosome landscapes of human somatic cell cultures show dependence on stress and regulation of genomic repeats by CGGBP1
Source: bioRxiv or medRxiv preprint supplement (doi:10.1101/2021.10.30.466567), 2021-10-30
Supplement: Supplementary file [file media-16.pdf]

Table S7

| <b>Samples</b>                                                    | <b>GM02639-CT</b> | <b>GM02639-KD</b> |
|-------------------------------------------------------------------|-------------------|-------------------|
| X chromosomal read count with maternal allelic identity           | 16548             | 7947              |
| Total X chromosomal read count with non-maternal allelic identity | 48160             | 21816             |
| Total X chromosomal read count subjected to allele identification | 64708             | 29763             |
| Somatic mutation rate for X chromosome                            | 25.57             | 26.70             |
