# Supplementary material for: Chimeric chromosome landscapes of human somatic cell cultures show dependence on stress and regulation of genomic repeats by CGGBP1
Source: bioRxiv or medRxiv preprint supplement (doi:10.1101/2021.10.30.466567), 2021-10-30
Supplement: Supplementary file [file media-17.pdf]

Table S8

| <b>Samples</b>                                            | <b>GM02639-CT</b> | <b>GM02639-KD</b> |
|-----------------------------------------------------------|-------------------|-------------------|
| Autosomal reads with maternal allelic identity            | 816032            | 394787            |
| Autosomal reads with paternal allelic identity            | 985983            | 466003            |
| Autosomal reads with chimeric allelic identity            | 76874             | 39370             |
| Total autosomal reads subjected to allelic identification | 1878889           | 900160            |
| Interallelic chimera frequency                            | 4.09              | 4.37              |
| Somatic mutation rate for autosomes                       | 54.96             | 54.26             |
| Corrected interallelic chimera frequency                  | 1.84              | 2.00              |
