# Supplementary material for: Chimeric chromosome landscapes of human somatic cell cultures show dependence on stress and regulation of genomic repeats by CGGBP1
Source: bioRxiv or medRxiv preprint supplement (doi:10.1101/2021.10.30.466567), 2021-10-30
Supplement: Supplementary file [file media-18.pdf]

Table S9

| Repeat types                       | GM02639-CT         |                      |              | GM02639-KD         |                      |              |
|------------------------------------|--------------------|----------------------|--------------|--------------------|----------------------|--------------|
|                                    | Number of elements | Length occupied (bp) | Sequence (%) | Number of elements | Length occupied (bp) | Sequence (%) |
| <b>SINEs:</b>                      | 4228               | 610798               | 16.54        | 2847               | 421569               | 16.77        |
| <b>ALUs</b>                        | 3761               | 557317               | 15.09        | 2517               | 385113               | 15.32        |
| <b>MIRs</b>                        | 465                | 53291                | 1.44         | 327                | 36130                | 1.44         |
| <b>LINES:</b>                      | 3897               | 725424               | 19.65        | 2543               | 465694               | 18.52        |
| <b>LINE1</b>                       | 3385               | 656389               | 17.78        | 2178               | 420403               | 16.72        |
| <b>LINE2</b>                       | 467                | 62928                | 1.7          | 332                | 41635                | 1.66         |
| <b>L3/CR1</b>                      | 29                 | 4326                 | 0.12         | 26                 | 3085                 | 0.12         |
| <b>LTR elements:</b>               | 1721               | 298335               | 8.08         | 1108               | 193987               | 7.72         |
| <b>ERV1</b>                        | 312                | 53566                | 1.45         | 193                | 34211                | 1.36         |
| <b>ERV1-MaLRs</b>                  | 686                | 112482               | 3.05         | 467                | 75439                | 3            |
| <b>ERV_classI</b>                  | 612                | 111808               | 3.03         | 385                | 72928                | 2.9          |
| <b>ERV_classII</b>                 | 79                 | 16387                | 0.44         | 39                 | 8458                 | 0.34         |
| <b>DNA elements:</b>               | 696                | 96124                | 2.6          | 501                | 68906                | 2.74         |
| <b>hAT-Charlie</b>                 | 329                | 41496                | 1.12         | 230                | 30269                | 1.2          |
| <b>TcMar-Tigger</b>                | 216                | 34349                | 0.93         | 166                | 25275                | 1.01         |
| <b>Unclassified:</b>               | 28                 | 2292                 | 0.06         | 19                 | 1721                 | 0.07         |
| <b>Total interspersed repeats:</b> |                    | 1732973              | 46.93        |                    | 1151877              | 45.82        |
| <b>Small RNA:</b>                  | 25                 | 1893                 | 0.05         | 15                 | 1247                 | 0.05         |
| <b>Satellites:</b>                 | 842                | 187698               | 5.08         | 474                | 103459               | 4.12         |
| <b>Simple repeats:</b>             | 878                | 35996                | 0.97         | 585                | 23688                | 0.94         |
| <b>Low complexity:</b>             | 107                | 4911                 | 0.13         | 69                 | 3201                 | 0.13         |
