# Supplementary material for: Chimeric chromosome landscapes of human somatic cell cultures show dependence on stress and regulation of genomic repeats by CGGBP1
Source: bioRxiv or medRxiv preprint supplement (doi:10.1101/2021.10.30.466567), 2021-10-30
Supplement: Supplementary file [file media-19.pdf]

Table S10

| <b>Samples</b>            | <b>GM02639-CT</b> | <b>GM02639-KD</b> |
|---------------------------|-------------------|-------------------|
| Total chimeric reads      | 44026             | 19734             |
| Reads with X-U-A chimeras | 2206              | 941               |
| Reads with Y-U-A chimeras | 3046              | 1848              |
| X-U-A (%)                 | 5.01              | 4.77              |
| Y-U-A (%)                 | 6.92              | 9.36              |
