# Supplementary material for: Chimeric chromosome landscapes of human somatic cell cultures show dependence on stress and regulation of genomic repeats by CGGBP1
Source: bioRxiv or medRxiv preprint supplement (doi:10.1101/2021.10.30.466567), 2021-10-30
Supplement: Supplementary file [file media-20.pdf]

Table S11

| <b>Sample Name</b>      | <b>GM01391-CT</b> | <b>GM01391-KD</b> |
|-------------------------|-------------------|-------------------|
| Read count              | 104768797         | 117629570         |
| Base count              | 15447113744       | 17535893169       |
| Mean read length        | 147.44            | 149.08            |
| Reads mapped by bowtie2 | 67725152          | 80980111          |
| % mapped reads          | 64.64             | 68.84             |
