# Supplementary material for: Chimeric chromosome landscapes of human somatic cell cultures show dependence on stress and regulation of genomic repeats by CGGBP1
Source: bioRxiv or medRxiv preprint supplement (doi:10.1101/2021.10.30.466567), 2021-10-30
Supplement: Supplementary file [file media-21.pdf]

Table S12

| <b>Samples</b>                                 | <b>GM01391-CT</b> | <b>GM01391-KD</b> |
|------------------------------------------------|-------------------|-------------------|
| Read counts with unexpected allelic identities | 6799763           | 2354827           |
| Read counts with expected allelic identities   | 11509946          | 4471689           |
| Somatic mutation rate                          | 59.08             | 52.66             |
