# Supplementary material for: Chimeric chromosome landscapes of human somatic cell cultures show dependence on stress and regulation of genomic repeats by CGGBP1
Source: bioRxiv or medRxiv preprint supplement (doi:10.1101/2021.10.30.466567), 2021-10-30
Supplement: Supplementary file [file media-22.pdf]

Table S13

| <b>Samples</b>                                     | <b>GM02639-CT</b> | <b>GM02639-KD</b> | <b>GM01391-CT</b> | <b>GM01391-KD</b> |
|----------------------------------------------------|-------------------|-------------------|-------------------|-------------------|
| Reads with maternal allelic identity               | 816032            | 394787            | 2053554           | 940277            |
| Reads with paternal allelic identity               | 985983            | 466003            | 2376579           | 1002715           |
| Interallelic chimeric read count                   | 76874             | 39370             | 75879             | 108513            |
| Reads subjected to allelic identification          | 1878889           | 900160            | 4506012           | 2051505           |
| Non-chimeric reads per interallelic chimeric event | 23.4              | 21.9              | 58.4              | 17.9              |
