# Supplementary material for: Chimeric chromosome landscapes of human somatic cell cultures show dependence on stress and regulation of genomic repeats by CGGBP1
Source: bioRxiv or medRxiv preprint supplement (doi:10.1101/2021.10.30.466567), 2021-10-30
Supplement: Supplementary file [file media-23.pdf]

Table S14

| <b>Samples</b>    | <b>Reads with interallelic chimera (without normalization)</b> | <b>Reads with interallelic chimera (after normalization)</b> |
|-------------------|----------------------------------------------------------------|--------------------------------------------------------------|
| <b>GM02639-CT</b> | 76874                                                          | 37561                                                        |
| <b>GM02639-KD</b> | 39370                                                          | 39370                                                        |
| <b>GM01391-CT</b> | 75879                                                          | 75879                                                        |
| <b>GM01391-KD</b> | 108513                                                         | 90751                                                        |
