# Supplementary material for: Chimeric chromosome landscapes of human somatic cell cultures show dependence on stress and regulation of genomic repeats by CGGBP1
Source: bioRxiv or medRxiv preprint supplement (doi:10.1101/2021.10.30.466567), 2021-10-30
Supplement: Supplementary file [file media-24.pdf]

Table S15

| Repeated measures ANOVA summary           | Repeat-free (Fig 2D) |     |        |                     |          | Alu-SINEs (Fig 2E) |     |        |                     |          | LINEs (Fig 2F) |     |        |                     |          | Simple repeats (Fig 2G) |     |        |                     |          |
|-------------------------------------------|----------------------|-----|--------|---------------------|----------|--------------------|-----|--------|---------------------|----------|----------------|-----|--------|---------------------|----------|-------------------------|-----|--------|---------------------|----------|
| Assume sphericity?                        | Yes                  |     |        |                     |          | Yes                |     |        |                     |          | Yes            |     |        |                     |          | Yes                     |     |        |                     |          |
| F                                         | 88.9                 |     |        |                     |          | 21.85              |     |        |                     |          | 22.95          |     |        |                     |          | 17.59                   |     |        |                     |          |
| P value                                   | <0.0001              |     |        |                     |          | <0.0001            |     |        |                     |          | <0.0001        |     |        |                     |          | <0.0001                 |     |        |                     |          |
| P value summary                           | ****                 |     |        |                     |          | ****               |     |        |                     |          | ****           |     |        |                     |          | ****                    |     |        |                     |          |
| Statistically significant (P < 0.05)?     | Yes                  |     |        |                     |          | Yes                |     |        |                     |          | Yes            |     |        |                     |          | Yes                     |     |        |                     |          |
| R squared                                 | 0.6897               |     |        |                     |          | 0.3533             |     |        |                     |          | 0.3646         |     |        |                     |          | 0.3054                  |     |        |                     |          |
| Was the matching effective?               |                      |     |        |                     |          |                    |     |        |                     |          |                |     |        |                     |          |                         |     |        |                     |          |
| F                                         | 103.6                |     |        |                     |          | 32.55              |     |        |                     |          | 40.59          |     |        |                     |          | 17.95                   |     |        |                     |          |
| P value                                   | <0.0001              |     |        |                     |          | <0.0001            |     |        |                     |          | <0.0001        |     |        |                     |          | <0.0001                 |     |        |                     |          |
| P value summary                           | ****                 |     |        |                     |          | ****               |     |        |                     |          | ****           |     |        |                     |          | ****                    |     |        |                     |          |
| Is there significant matching (P < 0.05)? | Yes                  |     |        |                     |          | Yes                |     |        |                     |          | Yes            |     |        |                     |          | Yes                     |     |        |                     |          |
| R squared                                 | 0.8654               |     |        |                     |          | 0.808              |     |        |                     |          | 0.8376         |     |        |                     |          | 0.7137                  |     |        |                     |          |
| ANOVA table                               | SS                   | DF  | MS     | F (DFn, DFd)        | P value  | SS                 | DF  | MS     | F (DFn, DFd)        | P value  | SS             | DF  | MS     | F (DFn, DFd)        | P value  | SS                      | DF  | MS     | F (DFn, DFd)        | P value  |
| Treatment (between columns)               | 4.379                | 5   | 0.8759 | F (5, 200) = 88.90  | P<0.0001 | 3.23               | 5   | 0.6461 | F (5, 200) = 21.85  | P<0.0001 | 2.253          | 5   | 0.4505 | F (5, 200) = 22.95  | P<0.0001 | 4.614                   | 5   | 0.9228 | F (5, 200) = 17.59  | P<0.0001 |
| Individual (between rows)                 | 40.81                | 40  | 1.02   | F (40, 200) = 103.6 | P<0.0001 | 38.49              | 40  | 0.9623 | F (40, 200) = 32.55 | P<0.0001 | 31.86          | 40  | 0.7965 | F (40, 200) = 40.59 | P<0.0001 | 37.67                   | 40  | 0.9417 | F (40, 200) = 17.95 | P<0.0001 |
| Residual (random)                         | 1.97                 | 200 |        | 0.009852            |          | 5.913              | 200 |        | 0.02957             |          | 3.925          | 200 |        | 0.01963             |          | 10.49                   | 200 |        | 0.05247             |          |
| Total                                     | 47.16                |     |        | 245                 |          | 47.64              |     |        | 245                 |          | 38.04          |     |        | 245                 |          | 52.78                   |     |        | 245                 |          |
| Data summary                              |                      |     |        |                     |          |                    |     |        |                     |          |                |     |        |                     |          |                         |     |        |                     |          |
| Number of treatments (columns)            | 6                    |     |        |                     |          | 6                  |     |        |                     |          | 6              |     |        |                     |          | 6                       |     |        |                     |          |
| Number of subjects (rows)                 | 41                   |     |        |                     |          | 41                 |     |        |                     |          | 41             |     |        |                     |          | 41                      |     |        |                     |          |
| Number of missing values                  | 0                    |     |        |                     |          | 0                  |     |        |                     |          | 0              |     |        |                     |          | 0                       |     |        |                     |          |
