# Supplementary material for: Chimeric chromosome landscapes of human somatic cell cultures show dependence on stress and regulation of genomic repeats by CGGBP1
Source: bioRxiv or medRxiv preprint supplement (doi:10.1101/2021.10.30.466567), 2021-10-30
Supplement: Supplementary file [file media-25.pdf]

Table S16

| <b>Sample Name</b>                              | <b>HEK293T-CT</b> | <b>HEK293T-KD</b> |
|-------------------------------------------------|-------------------|-------------------|
| Read count                                      | 90638165          | 83117053          |
| Base count                                      | 13866969515       | 12314145819       |
| Mean read length                                | 152.99            | 148.15            |
| Reads mapped by bowtie2                         | 49198728          | 31046804          |
| Reads remained unmapped                         | 41439437          | 52070249          |
| Base count for unmapped reads                   | 5938568698        | 7395489494        |
| Total A-U-B chimeric events in unmapped reads   | 4888              | 5472              |
| Chimeric DNA events per billion bases sequenced | 823.09            | 739.91            |
