# Supplementary material for: Chimeric chromosome landscapes of human somatic cell cultures show dependence on stress and regulation of genomic repeats by CGGBP1
Source: bioRxiv or medRxiv preprint supplement (doi:10.1101/2021.10.30.466567), 2021-10-30
Supplement: Supplementary file [file media-26.pdf]

Table S17

| Repeat types                       | HEK293T-CT         |                      |              | HEK293T-KD         |                      |              |
|------------------------------------|--------------------|----------------------|--------------|--------------------|----------------------|--------------|
|                                    | Number of elements | Length occupied (bp) | Sequence (%) | Number of elements | Length occupied (bp) | Sequence (%) |
| <b>SINEs:</b>                      | 2563               | 381682               | 43.21        | 1992               | 297479               | 29.63        |
| <b>ALUs</b>                        | 2546               | 380050               | 43.02        | 1938               | 291328               | 29.02        |
| <b>MIRs</b>                        | 17                 | 1632                 | 0.18         | 29                 | 4263                 | 0.42         |
| <b>LINEs:</b>                      |                    |                      |              |                    |                      |              |
| <b>LINEs:</b>                      | 740                | 92899                | 10.52        | 1046               | 126105               | 12.56        |
| <b>LINE1</b>                       | 732                | 92378                | 10.46        | 987                | 120840               | 12.04        |
| <b>LINE2</b>                       | 8                  | 521                  | 0.06         | 57                 | 5087                 | 0.51         |
| <b>L3/CR1</b>                      | 0                  | 0                    | 0            | 0                  | 0                    | 0            |
| <b>LTR elements:</b>               |                    |                      |              |                    |                      |              |
| <b>LTR elements:</b>               | 215                | 35041                | 3.97         | 525                | 57657                | 5.74         |
| <b>ERV1</b>                        | 3                  | 486                  | 0.06         | 76                 | 7344                 | 0.73         |
| <b>ERV1-MaLRs</b>                  | 161                | 26678                | 3.02         | 221                | 24152                | 2.41         |
| <b>ERV_classI</b>                  | 42                 | 6454                 | 0.73         | 219                | 24633                | 2.45         |
| <b>ERV_classII</b>                 | 9                  | 1423                 | 0.16         | 7                  | 1194                 | 0.12         |
| <b>DNA elements:</b>               |                    |                      |              |                    |                      |              |
| <b>DNA elements:</b>               | 51                 | 3845                 | 0.44         | 83                 | 6308                 | 0.63         |
| <b>hAT-Charlie</b>                 | 5                  | 540                  | 0.06         | 29                 | 2203                 | 0.22         |
| <b>TcMar-Tigger</b>                | 23                 | 1761                 | 0.2          | 38                 | 3100                 | 0.31         |
| <b>Unclassified:</b>               |                    |                      |              |                    |                      |              |
| <b>Unclassified:</b>               | 40                 | 3089                 | 0.35         | 82                 | 4828                 | 0.48         |
| <b>Total interspersed repeats:</b> |                    |                      |              |                    |                      |              |
| <b>Total interspersed repeats:</b> |                    | 516556               | 58.48        |                    | 492377               | 49.05        |
| <b>Small RNA:</b>                  |                    |                      |              |                    |                      |              |
| <b>Small RNA:</b>                  | 149                | 8425                 | 0.95         | 112                | 7407                 | 0.74         |
| <b>Satellites:</b>                 |                    |                      |              |                    |                      |              |
| <b>Satellites:</b>                 | 987                | 171056               | 19.36        | 1035               | 160049               | 15.94        |
| <b>Simple repeats:</b>             |                    |                      |              |                    |                      |              |
| <b>Simple repeats:</b>             | 757                | 62855                | 7.12         | 520                | 44163                | 4.4          |
| <b>Low complexity:</b>             |                    |                      |              |                    |                      |              |
| <b>Low complexity:</b>             | 12                 | 718                  | 0.08         | 7                  | 353                  | 0.04         |
